# Supplementary material
Source: publisher figshare collection journal article supplement (https://sage.figshare.com/ndownloader/files/12856340)
Supplement: Supplementary file 1 [file 12856340]

Archive with 1 entries (1 files):
- Supplementary Material.pdf
